# Supplementary material for: Improving osteogenesis of PLGA/HA porous scaffolds based on dual delivery of BMP-2 and IGF-1viaa polydopamine coating
Source: Royal Society of Chemistry journal article supplement (doi:10.1039/c7ra12062a), 2017-01-01
Supplement: c7ra12062a1.pdf [file c7ra12062a1.pdf]

1 **Support information for**

2 **Improving osteogenesis of PLGA/HA porous scaffolds based on**  
3 **dual delivery of BMP-2 and IGF-1 via polydopamine coating**

4 Jun Zhang<sup>1</sup>, Jianan Li<sup>1</sup>, Guoliang Jia<sup>1</sup>, Yikun Jiang<sup>1</sup>, Qinyi Liu<sup>1</sup>, Xiaoyu Yang<sup>1</sup>, Su Pan<sup>1\*</sup>

5 <sup>1</sup>Department of Orthopedic Surgery, the Second Hospital of Jilin University,

6 Changchun, Jilin 130041;

7 Current Address: Department of Orthopedic Surgery, the Second Hospital of Jilin

8 University, Changchun, Jilin 130041

9 \*Corresponding Author

10 E-mail: JilinPansu@163.com (PS);

1 **Supplementary Figures**

2 **Fig. S1** FT-IR spectra of PLGA/HA porous scaffolds with and without polydopamine

3 coating.

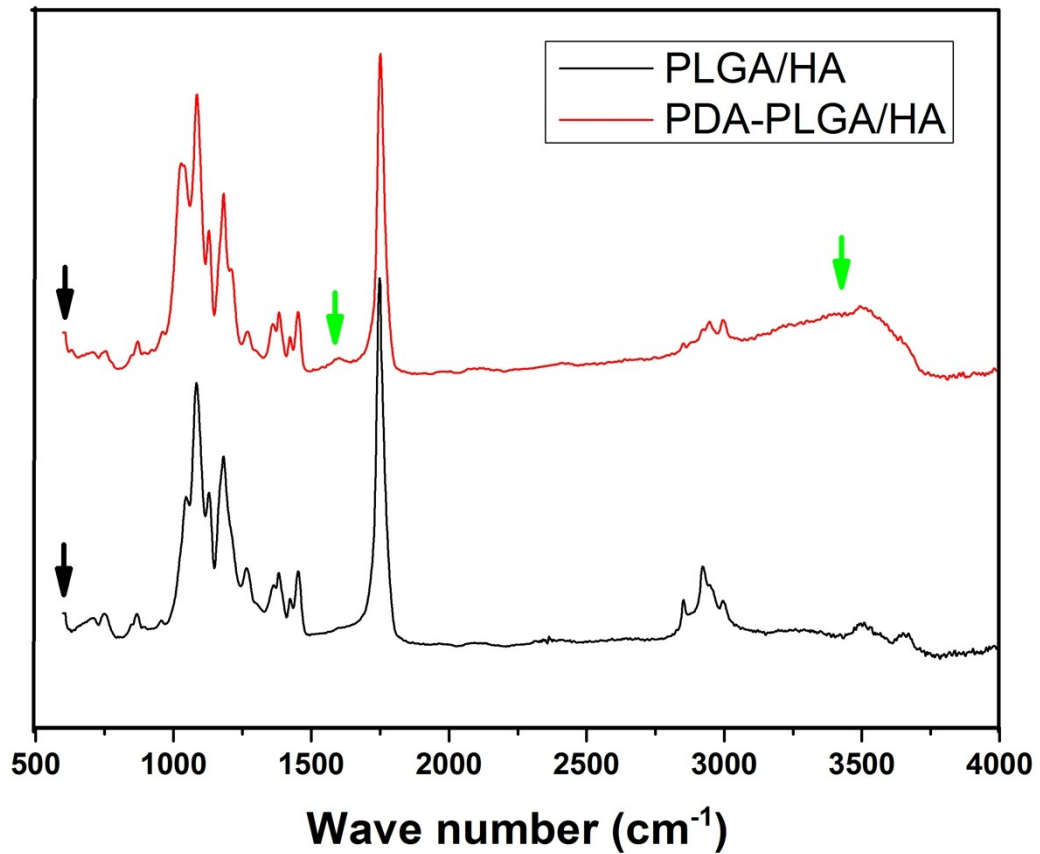

4

5 Fig. S1 FT-IR spectra of PLGA/HA and PDA-PLGA/HA porous scaffold, the

6 characteristic peaks of HA (**black arrow mark**), the characteristic peaks of PDA

7 (**green arrow mark**).

8

9

10

11

12

## 1 **Supplementary Methods**

### 2 Fourier transform infrared spectroscopy

3        Fourier transform infrared spectroscopy (FT-IR, Perkin Elmer, FTIR-2000) was  
4 used to determine the chemical structure of the PLGA/HA porous scaffold before and  
5 after soaking in PDA solution.
